# Management of family relationship information for a three-generation cohort study

Kazuro Shimokawa<sup>1\*</sup>, Mami Ishikuro<sup>2</sup>, Taku Obara<sup>2</sup>, Hirohito Metoki<sup>2</sup>,  
Satoshi Mizuno<sup>1</sup>, Satoshi Nagaie<sup>1</sup>, Masato Nagai<sup>2</sup>, Chizuru Yamanaka<sup>2</sup>,  
Hiroko Matsubara<sup>2</sup>, Mayumi Kato<sup>2</sup>, Yuki Sato<sup>2</sup>, Soichi Ogishima<sup>1</sup>, Takako Takai-Igarashi<sup>1</sup>,  
Masahiro Kikuya<sup>2</sup>, Atsushi Hozawa<sup>2</sup>, Fuji Nagami<sup>4</sup>, Shinichi Kuriyama<sup>2</sup>,  
Kengo Kinoshita<sup>2</sup>, Masayuki Yamamoto<sup>2</sup>, and Hiroshi Tanaka<sup>1</sup>

<sup>1</sup>Department of Health Record Informatics, Tohoku Medical Megabank Organization, Tohoku University, Sendai, Miyagi, Japan

<sup>2</sup>Department of Preventive Medicine and Epidemiology, Tohoku Medical Megabank Organization, Tohoku University, Sendai, Miyagi, Japan

<sup>3</sup>Department of Integrative Genomics, Tohoku Medical Megabank Organization, Tohoku University, Sendai, Miyagi, Japan

<sup>4</sup>Department of Public Relations and Planning, Tohoku Medical Megabank Organization, Tohoku University, Sendai, Miyagi, Japan

(Tel.: 81-22-273-6281, Fax: 81-22-273-6281)

E-mail: [shimokawa@megabank.tohoku.ac.jp](mailto:shimokawa@megabank.tohoku.ac.jp)

## Abstract

A system for inputting and storing family information, named “BirThree Enrollment,” was developed to promote a birth and three-generation cohort study (BirThree Cohort Study), and this system was operated successfully. In the study, it was necessary to satisfy many operational demands. Input information is overwritten and changed continuously. Complex kinship information must be quickly and accurately input and corrected, and information on those families

29 not yet recruited must be retrieved. For these purposes, many devices are needed, from an input interface to the  
30 internal data structure. In the field of genetic statistics, a simple standard expressive form is used for describing family  
31 structure. This form has sufficient information for genetics; however, we developed this form further for our purposes  
32 in conducting the BirThree Cohort Study. To provide information about family roles as required in the BirThree Cohort  
33 Study, we expanded the data structure, and constructed the system that is able to be used for the daily operation.  
34 In our system, family pedigree information is stored along with initial clinical information, and enabled the input of all  
35 self-reported information to the data base. Operators are able to input this family information before the day is out.  
36 As a result, when recruitment is completed, family information will be completed concurrently. Therefore, it is possible  
37 to immediately know a certain person's family structure. By using our system, data correction was improved  
38 dramatically, and the system was operated successfully. This study is the first report of the method for storing three  
39 generations of family data.

40

41 **Keywords:** birth cohort, three-generation cohort study, database, kinship, recruit

42

## 43 1. INTRODUCTION

44 The Tohoku Medical Megabank (TMM) Project aims to provide creative reconstruction methods and solve  
45 medical problems arising from the Great East Japan Earthquake (GEJE), which occurred in March 2011 [1, 2]. In  
46 the TMM Project, two prospective cohort studies were initiated in Miyagi and Iwate Prefectures: a population-based  
47 adult cohort study called the TMM Community-Based Cohort Study (TMM CommCohort Study) and a birth and  
48 three-generation cohort study called the TMM Birth and Three-Generation Cohort Study (TMM BirThree Cohort  
49 Study) [3]. For the CommCohort Study, the TMM recruited participants at those sites where the specific health  
50 checkups of the annual community health examination were performed, at seven Community Support Centers in  
51 Miyagi Prefecture, and at five satellites in Iwate Prefecture. For the TMM BirThree Cohort Study, the TMM recruited  
52 pregnant women at obstetric clinics and hospitals in Miyagi and Iwate Prefectures along with their children and the  
53 children's siblings, fathers (husbands), grandparents, and other family members. The TMM project contributed to  
54 the establishment of an integrated biobank that combines physiological and clinical data with genomics data.  
55 Additionally, some of the bio specimens collected by the TMM project were analyzed by other research  
56 laboratories, and stored in the TMM database, so as to facilitate a full range of omics analyses [4, 5].

57 In the CommCohort Study, many of the parties concerned were unrelated individuals. Thus, information on  
58 kinship relationships was not used for earlier ToMMo research, such as the 1KJP reference panel [6] that used the  
59 information collected for the CommCohort Study. They are the results of several preceding studies [7-9] that did not  
60 use family information. In contrast, all of the participants in the BirThree Cohort Study were related to other  
61 participants.

62 Birth cohort studies were among the first types of research to use data on family relationships. Preceding  
63 studies on birth cohorts include LifeLines, ALSPAC, MoBA, DNBC, and BiCCA [10-14]. Some of these studies  
64 successfully recruited 100,000 or more pregnant women in the birth cohorts. In these birth cohorts, a primary aim  
65 was to follow mothers and their newborns; therefore, recruitment of pregnant women is given priority. There were  
66 few opportunities to recruit additional relatives, and thus the recruitment and enrollment of other relatives was  
67 uncommon.

68 One of the key features of the BirThree Cohort Study is that three-generation cohorts were recruited, rather than  
69 just birth cohorts. Therefore, inputting and treating family information is more complex in a three-generation cohort  
70 study than in other cohort studies. The Lifelines study positively collects information not only on a pregnant woman  
71 and the child, but also on the father and other family members, as much as possible. Thus, it is an important initial  
72 research for treating family information. Such family information, however, is stored and maintained by a different  
73 system than that used for clinical information. As a result, massive data reduction after recruitment is  
74 indispensable, and much work might be needed to maintain the correspondence of clinical information and family  
75 information.

76  
77 As a result, it was necessary to devise a data structure to operate the three-generation cohort recruitment. To  
78 express kinship information, a common data structure has traditionally been used in the field of statistical genetics  
79 [15-17]. Because the traditional data format can describe a parent-child kinship (Fig. 1A, B), it is necessary and  
80 sufficient for drawing family pedigrees and expressing genetic relationships. However, in some large-scale studies,  
81 such as the BirThree Cohort Study, this data format is insufficient to meet the various operational demands of three-  
82 generation cohort research. For instance, the format is not sufficient for the enrollment of relatives other than parent-  
83 child, such as grandfather-child. Moreover, there are some difficult problems concerning the data operation for the  
84 withdrawal of consent. This paper explains the basic idea underlying the BirThree Cohort Study and the data structure  
85 based on the specification. The specification is chiefly organized to handle the following operational matters: "Data  
86 description," "Retrieval," "Consent withdrawal," and "Family roles."

87

88

89

90

## 91 **2. METHODS AND RESULTS**

92

93

### 94 **2.1 Bidirectional Related Line**

95 The concept of the data structure used in typical statistical genetics is described in Fig. 1A, B. Related Lines 1  
96 and 2 show the relationships between the Child Identification Number (ID) and the Maternal ID or Paternal ID,  
97 respectively. These Lines are directional, such that the mother can be retrieved only by the certain child (Related  
98 Lines 1), and the child cannot be retrieved by their mother. This structure is used in the kinship2 [18] package in the  
99 R statistics program and suffices to describe genetic relationships. There are some problems, however, with  
100 retrieving family relationships by using the Related Lines. For instance, to find the child of a certain mother, it is  
101 necessary to search all of the children in the database in the worst case scenario. Thus, we first made the Related  
102 Line bidirectional (Fig. 1C). Each related line can thus be defined by two kinds of edges (ex., Child to Mother, Mother  
103 to Child) in a direct acyclic graph, rather than one edge in an undirected graph, following a basic idea of network  
104 theory [19-21]. With this new bidirectional line, it becomes easier to trace father from mother, by retrieving from  
105 mother to child, and from child to father. In this way, relationships between parents are retrieved more quickly (Figs.  
106 1B, D). Retrieving all members in the family becomes possible by using this line. However, retrieval might become  
107 difficult when there is a member who is not participating in the family. We discuss this problem in the following  
108 paragraph.

109

110

## 2.2 Enrollment System of three generations

### 2.2.1 Extended Line

The necessity for registering the person who doesn't have a parent-child relationship appears, while registering a family's member. One example is that of the relationship between two participants who are connected by a nonparticipant, which is not expressible (Fig. 2A). In this case, the relationship between "Newborn" and "Grandfather" cannot be made without the father's participation. One solution to this problem is to define another type of Related Line (the Extended Related Line). The Extended Related line connects the relationship from any person in a seven-member family to the other person. Therefore, this line can connect two members in the seven-member family who do not have a parent-child relationship. This approach is thought to work well when the scale of the cohort is small and the lineage is simple. We explain the concept of defining an Extended Related Line for registration below.

According to the inclusion criteria for the TMM BirThree Cohort, pregnant women must be recruited first in a three-generation family. Then, other family members in the three-generation cohort (newborn (child), father, grandmother, grandfather, grandmother-in-law, and grandfather-in-law) are recruited. These seven family members (the pregnant woman and the other 6 family members) are recruited as one unit. Thus, when attention is paid to a specific participant, the participation status of the other six members should be understandable. By means of the bidirectional Related Line, a mother related to a child and the child's father can be retrieved if all three people are participating, as shown in Fig. 1D. It is impossible, however, to find another family member who is connected through a nonparticipant. For instance, when the husband is not a participant, the grandfather-in-law (paternal grandparent) cannot be enrolled and retrieved from the mother's information by using the bidirectional Related Line (see the red arrow in Fig. 2A).

One solution would be to extend the Related Line to obtain an Extended Related Line. The green arrows in Fig. 2B show this type of Extended Related Line. Operators can easily find members of the family connected to the pregnant woman and Newborn by using an Extended Related Line. The Extended Related Line offers a method for defining all of the relationships in the cohort. Therefore, the example problem can be solved by defining Extended Related Lines between the mother and grandfather-in-law (green arrow 1), the mother and the grandmother-in-law (green arrow 2), the Newborn and the grandfather-in-law (green arrow 3), and the Newborn and the grandmother-in-law (green arrow 4) (see Fig. 2B). The relationships between these individuals can be enrolled and retrieved from the mother (a pregnant woman) to the grandparents, or from the Newborn to the grandparents, through Extended

139 Related Lines (Fig. 2B), even if the father does not participate in the cohort. Table 1 presents the number of Extended  
 140 Related Lines needed for all patterns of seven family members.

141

142 This method has operational problems, however, especially during registration. It is necessary to define many  
 143 Related Lines, and operators should correctly select the proper Related Lines when enrolling each participant.  
 144 Even in a case such as the one shown in Fig. 2B, which is not very complex, four (2 x 2 (bidirectional)) new  
 145 different lines are needed to make connections from the mother. This solution might work when the data input  
 146 operator is able to spend sufficient time or when complex family relationships need not be drawn. In the case,  
 147 however, in order to connect seven family members with Related Lines, it is necessary to select the correct colored  
 148 lines from among 21 x 2 (bidirectional) = 42 types of Related Lines (see Table 1). This operation becomes a  
 149 considerably time-consuming load for the operator. During the first stage of recruitment of the BirThree Cohort, this  
 150 idea was adopted for our system, and put into operation. However, operation of the system becomes difficult, as  
 151 the scale of the BirThree Cohort in the TMM became large-scale. Therefore, this idea was not adopted in the  
 152 present system, although we introduce the idea here for reference.

153

154 **Table 1.** Example of an Extended Related Line

155

| No. | Node 1 | Node 2             | No. | Node 1             | Node 2             |
|-----|--------|--------------------|-----|--------------------|--------------------|
| 1   | Child  | Mother             | 12  | Father             | Grandmother        |
| 2   | Child  | Father             | 13  | Father             | Grandfather        |
| 3   | Child  | Grandmother        | 14  | Father             | Grandmother-in-law |
| 4   | Child  | Grandfather        | 15  | Father             | Grandfather-in-law |
| 5   | Child  | Grandmother-in-law | 16  | Grandmother        | Grandfather        |
| 6   | Child  | Grandfather-in-law | 17  | Grandmother        | Grandmother-in-law |
| 7   | Mother | Father             | 18  | Grandmother        | Grandfather-in-law |
| 8   | Mother | Grandmother        | 19  | Grandfather        | Grandmother-in-law |
| 9   | Mother | Grandfather        | 20  | Grandfather        | Grandfather-in-law |
| 10  | Mother | Grandmother-in-law | 21  | Grandmother-in-law | Grandfather-in-law |
| 11  | Mother | Grandfather-in-law |     |                    |                    |

156

157 When a Related Line connects every set of seven members, 21 x 2 (bidirectional) different Related Lines  
 158 are needed.

159

160

161

## 2.2.2 BirThree Enrollment system

We have developed the BirThree Enrollment system instead of using the system of Extended Related Lines in order to accurately describe complex family roles and avoid the input of incorrect data. It is thought that such a family input system is indispensable to recruit the family members, and this system will become the main current in the Cohort study in the future. The BirThree Enrollment system has a family role table that is used to enroll seven family members. This idea considers two critical factors. One is to apply a pregnant ID, instead of a family ID, to manage the family role table. A pregnant ID is allocated at each pregnancy. A pregnant woman and the number of pregnancies are always identified by a pregnant ID, and the ID is a key to each family role table. The family role table stores seven family member's IDs and their roles. It corresponds to the red or yellow rectangle in Figure 3. By using the pregnant ID, it is possible to recruit members over a long term with stability. On the other hand, a family ID is an idea that comes from the field of genomic analysis. The participants who exist in the same family tree (two or more pregnant women can be included) will have same family ID. It is difficult to use this idea with the Cohort enrolling system. This is because the family can be mutually connected after a long period of recruitment, and the number of families IDs decreases. Then, the pregnant woman as a proband in the family cannot be identified.

The other factor is the family information batch entry screen, a new family data enrolling method (Fig. 4). The batch entry screen makes it possible to design a comprehensible data registration interface (see supplemental file). The entry screen not only enables the registration of relationships through nonparticipants, but also facilitates later retrieval and eases registration. A family role table is newly prepared when the pregnant woman is enrolled. At that time, the other six family members are added as provisional participants for whom recruitment is necessary in an empty column (see Section 2.4 Fig. 4). When some of these six non-participants are recruited, and some empty columns are filled, related lines are automatically drawn by the BirThree Enrollment system.

As in the example with the nonparticipating father shown in Fig. 2A, even in the situation whereby a pregnant woman and her father-in-law cannot be connected directly, the Related Lines 1, 2, and 3 in Fig. 2A among the family members are automatically drawn by our BirThree Enrollment system, and this father is automatically registered as a provisional member. Therefore, lines are always connected whenever family members are retrieved.

191 The family information batch entry screen allows one person to be enrolled in two or more role tables at the  
192 same time. As a result, one person can have two different roles in two different families. Fig. 3 shows a person  
193 enrolled as a mother in the family role table enclosed by the red rectangle and as a grandmother in the family role  
194 table with the purple rectangle. Such complex expressions are possible in this system. The BirThree Enrollment  
195 system was adopted because of this ability.

## 198 2.3 Implementation

199 Fig. 4 shows the family information batch entry screen that was used for recruitment in the TMM BirThree  
200 Cohort Study. In the implementation, the pregnant woman's ID is treated as the main key in the family role table.  
201 Therefore, the pregnant woman is always in the family role table. This entry screen is an enrolling screen that is  
202 used by the operator during recruitment. All of the positions that the seven family members occupy are created in  
203 advance.

204 The family role table corresponds to the entry screen. The input system registers data in both the family role  
205 table and the Related Lines. Related Lines are automatically formed for unit members (pregnant woman (mother),  
206 newborn (child), father, grandmother, grandfather, grandmother-in-law, and grandfather-in-law). Uncles, aunts, and  
207 cousins are also other members of the unit; therefore, operators must draw those Related Lines by hand.

208 While retrieving the family structure, the database extracts family information by reading only the table of the  
209 corresponding family role. Tracing a related line for the retrieval is not necessary. Therefore, the load on the  
210 system is minimized. Moreover, it becomes easy to call a participant through the pregnant woman, because the  
211 system displays whether there is a family member who has not yet been recruited during retrieval.

## 214 2.4 Withdrawal of Consent

215 When a pregnant woman withdraws her consent, the consent of her new born child is withdrawn. On the other  
216 hand, other family members (siblings, father, Grandparents) stay as participants in principle, because their consent  
217 forms are still effective. Alternatively, they are registered as a participant in the follow-up survey by the TMM Project.  
218 In contrast, when a member other than a pregnant woman withdraws consent, only that person's name and



219 information are deleted. For that case, the Related Line containing that person and other members of the family is  
220 not deleted, and the family role table remains. For example, when a participating father withdraws his consent, the  
221 Related Lines 1, 2, and 3 in Fig. 2A are maintained to avoid re-recruiting people who have been withdrawn.

222 An important point of our system is to process the consent withdrawal in real time. A problem might not occur to  
223 process the consent withdrawal after recruitment ends, when the recruitment period is short. When the system  
224 continues working for a long time, however, the consent withdrawal process needs to be reflected at once. This is  
225 because when the follow-up survey and re-recruiting is performed, withdrawal information must reflect the process  
226 up until then.

227 Such a mechanism must be carefully implemented to ensure that it does not contradict the contents written in the  
228 informed consent and withdrawal documents. This is because the level of information that should be removed is  
229 written into the withdrawal document. It is necessary to design the informed consent and withdrawal documents so  
230 that no contradictions should occur in data processing.

231

232

## 233 **2.5 Error Correction**

234 We designed a function to identify and report discrepancies in the database. This function was designed for  
235 important uses and had a significant influence on the quality of the cohort information. We had to report discrepancies  
236 immediately when mistakes in the registration data caused severe problems. Here, we explain the check function,  
237 which was used for information about family relationships.

238 Bidirectional Related Lines are important items to check, because they include information that overlaps among  
239 family role tables. The BirThree Enrollment system automatically registers all of the Related Lines for the seven family  
240 members. Therefore, family role tables and those related lines never contradict each other when all the family  
241 information is entered through the family information batch entry screen. Not all relationships, however, can be  
242 entered by using the family information batch entry screen. For instance, the Related Lines between a pregnant  
243 mother and her siblings, and between a newborn and its siblings are drawn by hand. The data correction routine  
244 recomposes the family relationships by using the Related Line, and compares it with the information in the family role  
245 table. Any discrepancies are reported to the data entry operators for correction. Due to this routine work, errors in  
246 family relationships were minimized. Related Lines and family role tables overlap; therefore, they were thoroughly

247 tested for contradictions. This report has been confirmed by the data entry operators, and the data correction routine  
248 operates correctly every day.

### 251 **3 DISCUSSION AND CONCLUSIONS**

252 We created an input and data registration system, “BirThree Enrollment,” for a birth and three-generation cohort  
253 study and successfully collected data from more than 70,000 BirThree Cohort participants, which were required for  
254 a research platform [10, 22-25]. This system was used by more than 150 BirThree Cohort Genome Medical Research  
255 Coordinators (GMRC), and development was advanced to the fifth version.

256 TMM’s work is the first attempt in the world to create a three-generation Cohort Study that collects participant  
257 data on a 100,000-person scale. Our study was able to achieve the large-scale number of participants, although  
258 some other birth cohort studies were unable to collect the aimed numbers of participants, and closed [26]. The  
259 operation of this system contributed to the success of the research. From the viewpoint of data science, this work is  
260 a method for displaying and browsing a 7-member family tree, and provides the data structure required to achieve  
261 it. It is practically effective even when a family’s information changes dynamically by withdrawal of the agreement.

262 The remaining problems include handling information on a participant who gave birth two times or more and a  
263 father who divorced the pregnant woman. Our system was insufficient to decide which data to store for the person  
264 who had participated two times or more. The other problem, the “father who divorced,” did not actually occur for  
265 pregnant women who participated two or more times with a different husband for each pregnancy. It was unnecessary  
266 to connect information about the different fathers.

267  
268 It is difficult to complete a three-generation cohort project with high efficiency, because the process of inputting  
269 family information is complicated. To address this problem, computational support is extremely important. In this  
270 study, many problems involved with treating family information have been solved with reference to six viewpoints.  
271 We expect this study to be useful for the next third-generation cohort study.

272  
273  
274  
275

## 276 4. ACKNOWLEDGMENTS

277 This study was supported by grants from the Reconstruction Agency, the Ministry of Education, Culture, Sports,  
278 Science and Technology (MEXT), and the Japan Agency for Medical Research and Development (AMED). This  
279 study was also supported by JSPS KAKENHI (grant number JP16K12717).

280 The authors express their gratitude to the people of Japan and of the world for their valuable support of the areas  
281 affected by the GEJE after the disaster. We thank the members of ToMMo and IMM, including GMRCs and the office  
282 and administrative personnel for their assistance. We also thank Mr. Hiroshi Hanzawa, Mrs. Tomomi H. Oonuma,  
283 Mr. Junji Takada, Mrs. Yuka O. Takahashi, and Mr. Gosuke Takahashi for technical assistance.

## 287 5. REFERENCES

- 288 1. White paper on disaster management 2011 Available from:  
289 [http://www.bousai.go.jp/kaigirep/hakusho/pdf/WPDM2011\\_Summary.pdf](http://www.bousai.go.jp/kaigirep/hakusho/pdf/WPDM2011_Summary.pdf)
- 290 2. Satomi S. The Great East Japan Earthquake: Tohoku University Hospital's effort and lessons learned. Surg  
291 Today. 2011; 41:1171-81.
- 292 3. Kuriyama S, Yaegashi N, Nagami F, Arai T, Kawaguchi Y, et al. The Tohoku Medical Megabank Project: Design  
293 and Mission. J Epidemiol 2016;26(9): 493-511.
- 294 4. Hewitt RE. Biobanking: the foundation of personalized medicine. Curr Opin Oncol 2010;23:112-19.
- 295 5. Manorio TA, Bailey-Wilson JE, Collins FS. Genes, environment and the value of prospective cohort studies. Nat  
296 Rev Genet 2006;18:671-75.
- 297 6. Nagasaki M, Yasuda J, Katsuoka F, Nariai N, Kojima K, et al. Rare variant discovery by deep whole-  
298 genome sequencing of 1,070 Japanese individuals. Nat Comm 2015;9018. [DOI: 10.1038/ncomms9018](https://doi.org/10.1038/ncomms9018)
- 299 7. The International HapMap Consortium, The International HapMap Project. Nature 2003;426:789-796.
- 300 8. 1000 Genomes Project Consortium, Abecasis GR, Altshuler D, et al. A map of human genome vari-  
301 ation from population-scale sequencing. Nature 2010;467:1061-73.
- 302 9. Genome of The Netherlands Consortium. Whole-genome sequence variation, population structure and

- 303 demographic history of the Dutch population. *Nat Genet* 2014;46:818-25.
- 304 10. Salome Scholtens, Nynke Smidt, Morris A Swertz, et al. Cohort Profile: LifeLines, a three-generation cohort study and biobank. *International Journal of Epidemiology*, 2015;44(4):1172-1180.
- 305
- 306 11. Pembrey M, ALSPAC Study Team. The Avon Longitudinal Study of Parents and Children (ALSPAC) a resource for genetic epidemiology. *European Journal of Endocrinology* 2004; 151 (Suppl. 3):U125-U129.
- 307
- 308 12. Norwegian Mother and Child Cohort Study: MoBa. Available from: <https://www.fhi.no/en/studies/moba/>.
- 309 13. Danish National Birth Cohort: Available from: <https://www.ssi.dk/English/RandD/Research%20areas/Epidemiology/DNBC.aspx>.
- 310
- 311 14. Birth Cohort Consortium of Asia: Available from: <http://www.bicca.org/>.
- 312 15. LINKAGE programs for Windows and Linux. Available from: <http://www.jurgott.org/linkage/LinkagePC.html>.
- 313 16. Genehunter Available from: <http://linkage.rockefeller.edu/soft/>.
- 314 17. PLINK: whole genome association analysis toolset. Available from: <http://zzz.bwh.harvard.edu/plink/>.
- 315 18. Sinnwell JP, Therneau TM, and Schaid DJ. The kinship2 R Package for Pedigree Data. *Hum Hered.* 2014;78(2): 91–93.
- 316
- 317 19. Albert R, Barabash AL. Statistical Mechanism of complex networks. *Nature* 2002;406:378-382.
- 318 20. Clarice R. Weinberg. Can DAGs Clarify Effect Modification? *Epidemiology.* 2007 September ; 18(5): 569–572.
- 319 21. Marit M. Suttorp, Bob Siegerink, Kitty J. Jager, Carmine Zoccali and Friedo W. Dekker. Graphical presentation of confounding in directed acyclic graphs. *Nephrol Dial Transplant* (2015) 30: 1418–1423.
- 320
- 321 22. Murcray CE, Lewinger JP, Conti DV, Thomas DC, Gauderman WJ. Sample size requirements to detect gene-environment interactions in genome-wide association studies. *Genet Epidemiol.* 2011;35:201–10. doi:10.1002/gepi.20569.
- 322
- 323 23. Gauderman WJ. Sample size requirements for matched case-control studies of gene-environment interaction. *Stat Med.* 2002;21:35–50.
- 324
- 325 24. Powell JE, Visscher PM, Goddard ME. Reconciling the analysis of IBD and IBS in complex trait studies. *Nat Rev Genet.* 2010;11:800–5.
- 326
- 327 25. Browning SR, Browning BL. Identity by descent between distant relatives: detection and applications. *Annu Rev Genet.* 2012;46:617–33.
- 328
- 329 26. Big longitudinal social study halted by lack of recruits. Available from: <https://www.theguardian.com/society/2015/nov/01/life-study-esrc-cancelled-mothers-ethnic-recruitment>
- 330
- 331
- 332

333  
334  
335  
336  
337  
338  
339  
340  
341  
342  
343  
344  
345  
346  
347  
348  
349  
350  
351  
352  
353  
354  
355  
356  
357  
358  
359  
360  
361  
362

**Fig. 1.**

**Basic Related Lines describing the relationship between two people.**

A and B. One-way Related Lines. The child cannot be traced from the mother (or father) by using this line. C. A Bidirectional Related Line, which can be used to trace from a child to a mother and from a mother to a child. D. We can identify the father by tracing the newborn (child) from the mother by using a Bidirectional Related Line.

**Fig. 2.**

**Basic and Extended Related Lines.**

A. A Basic Related Line only connects the child with the parents. The dotted rectangle shows the family member(s), who have not yet been recruited. When the father is a nonparticipant, a related line is not connected with grandparents by the newborn baby. B. An Extended Related Line expresses the relationships among seven family members using many predefined lines. Four extended related lines (green arrow) are selected from among the 21 extended significantly related lines to enroll this family.

**Fig. 3.**

**Explanation of family role tables when a participant has two or more family roles.**

In this figure, the “mother” in the family role table enclosed within a red rectangle is also a “grandmother” in the family role table within a purple rectangle. When two or more family role tables are applied for one person, it means that the individual has different family roles in each table.

363

364 **Fig. 4.**

365 **Actual family information batch entry screen.**

366 The system is designed so that each family member is enrolled in a specific position in the screen. At the same  
367 time, when a member is enrolled, he or she is also enrolled in the family role table, and the Related Lines between  
368 members are automatically connected. The dotted rectangle shows other members of the family who have not yet  
369 been recruited. In this figure, "Provisional ID" refers to a temporary ID and indicates that the member has not yet  
370 been recruited. Related Lines that correspond to the red line in this figure have already been connected, because  
371 the three members (GM (Grand Mother), Mother, New-Born) were already recruited. When "father" is enrolled, the  
372 Related Lines that correspond to the green line will be automatically connected. When "father" withdraws after  
373 participation, the Related Lines corresponding to the green line are kept (not deleted). The number of family  
374 members can be increased by clicking the "Add sibling" or "Add Other" button (See the supplementary file).

375

376

377

378

379

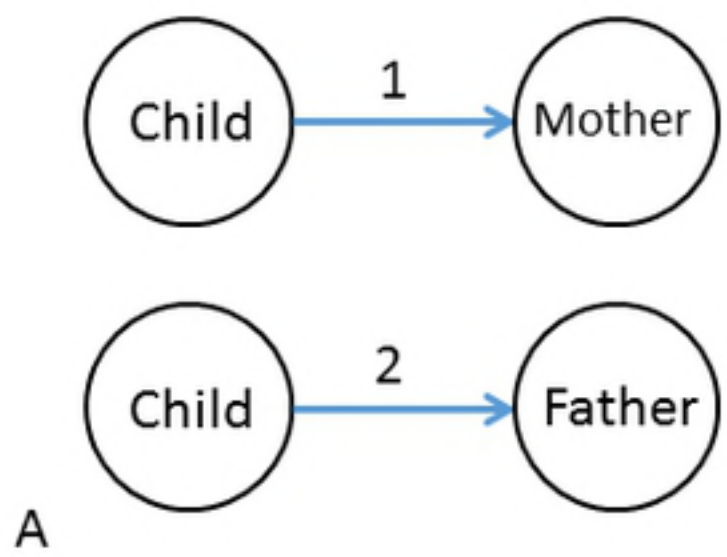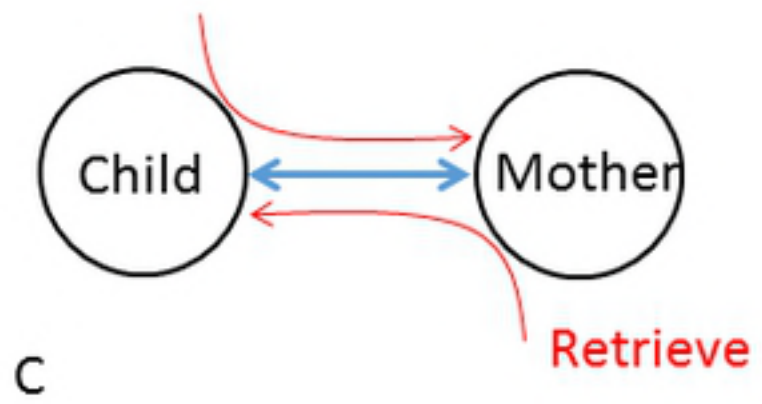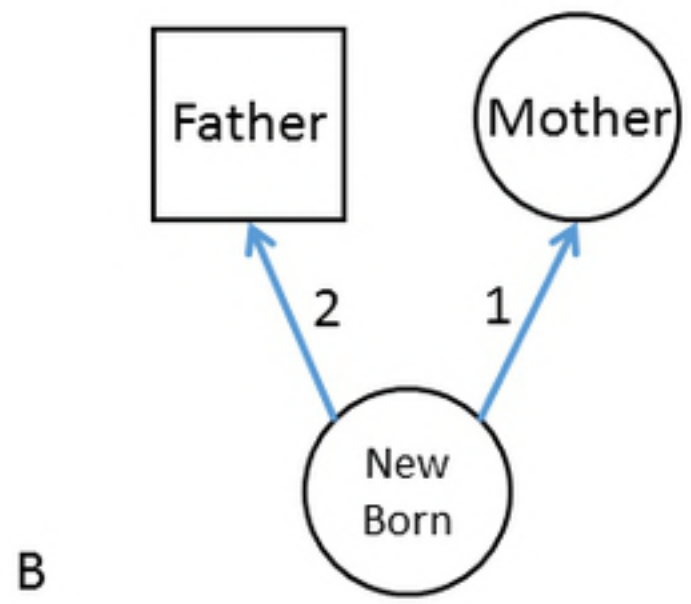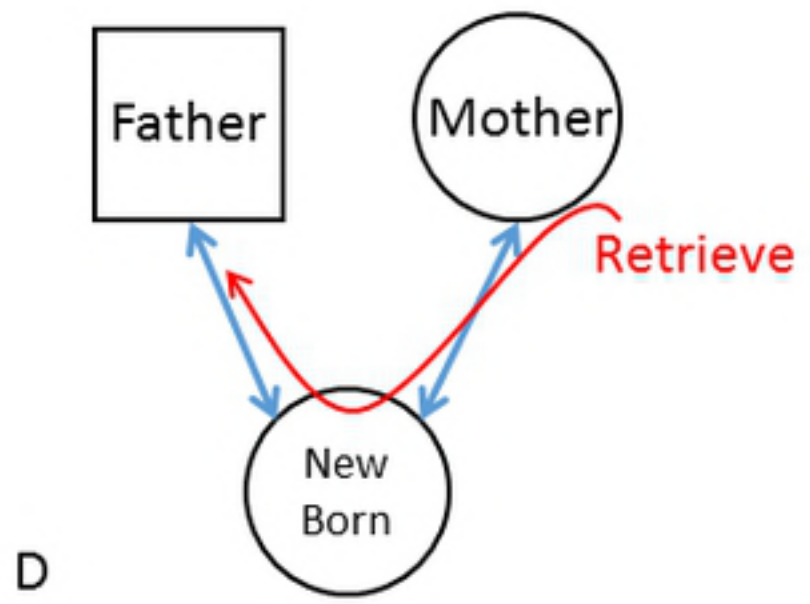

Figure 1

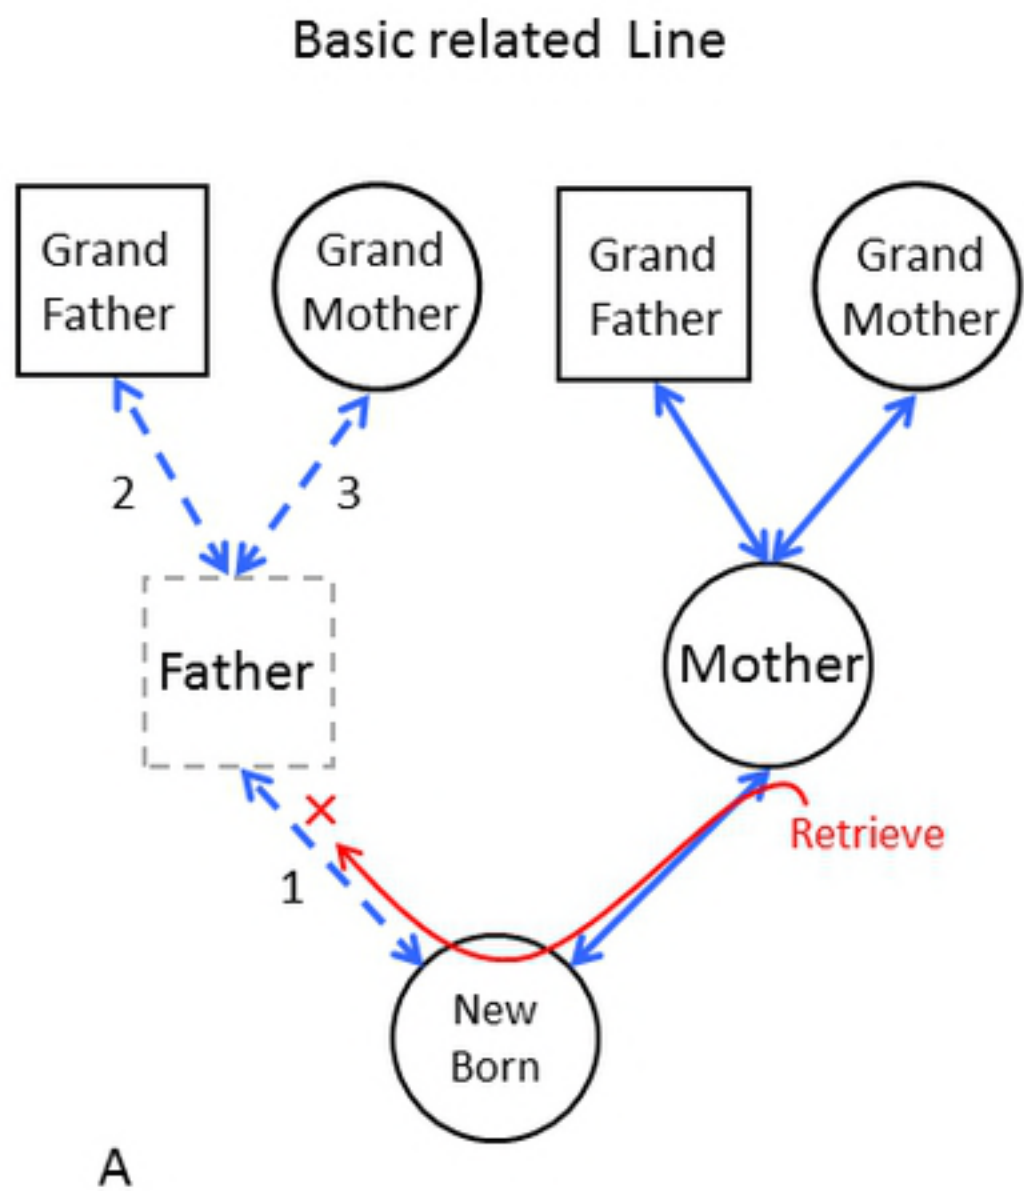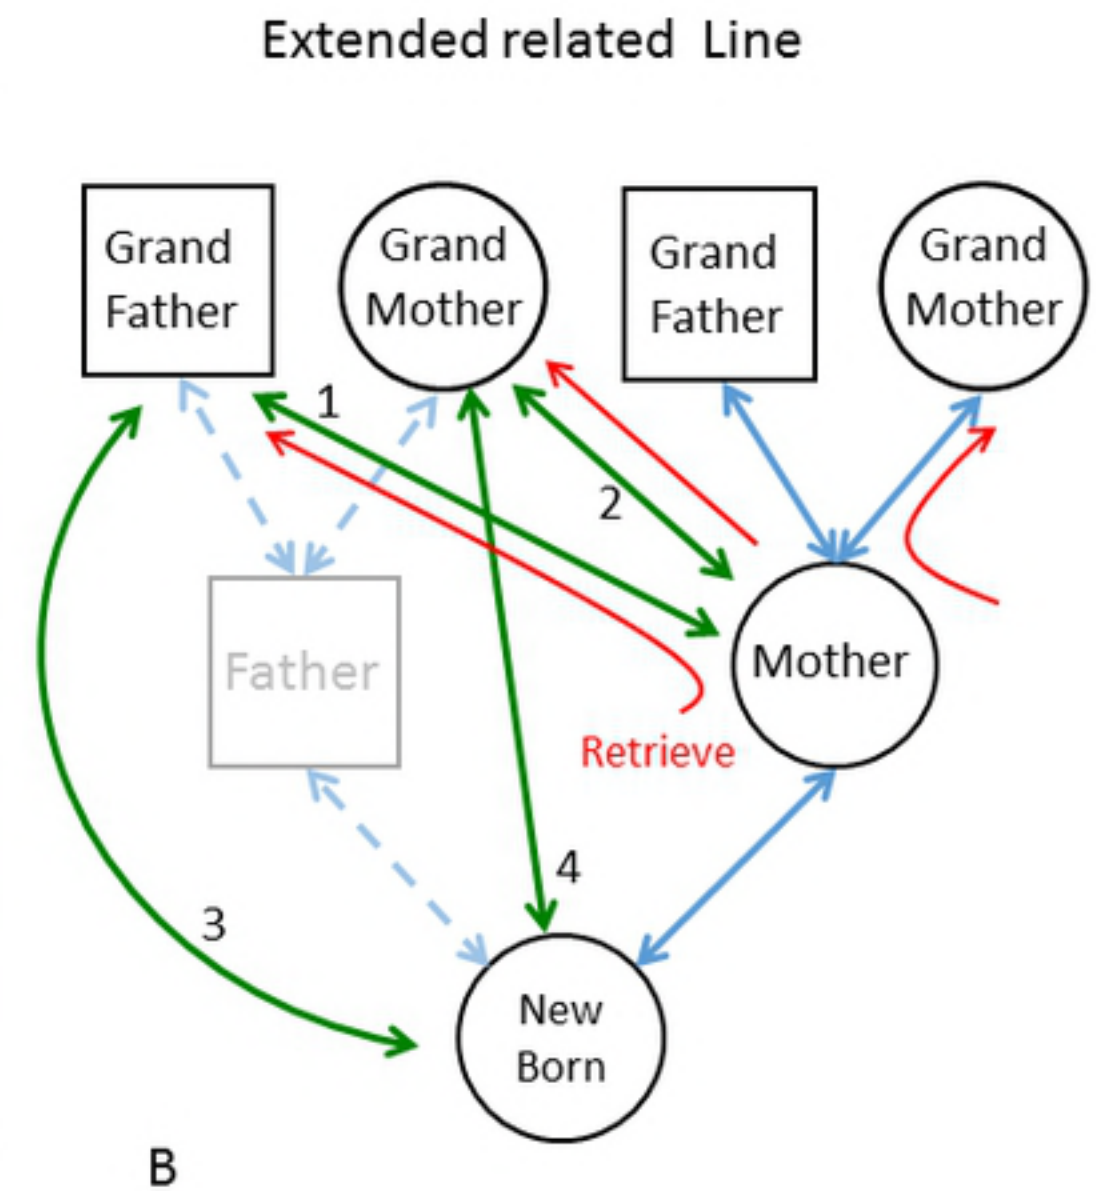

Figure2



# Family Roles

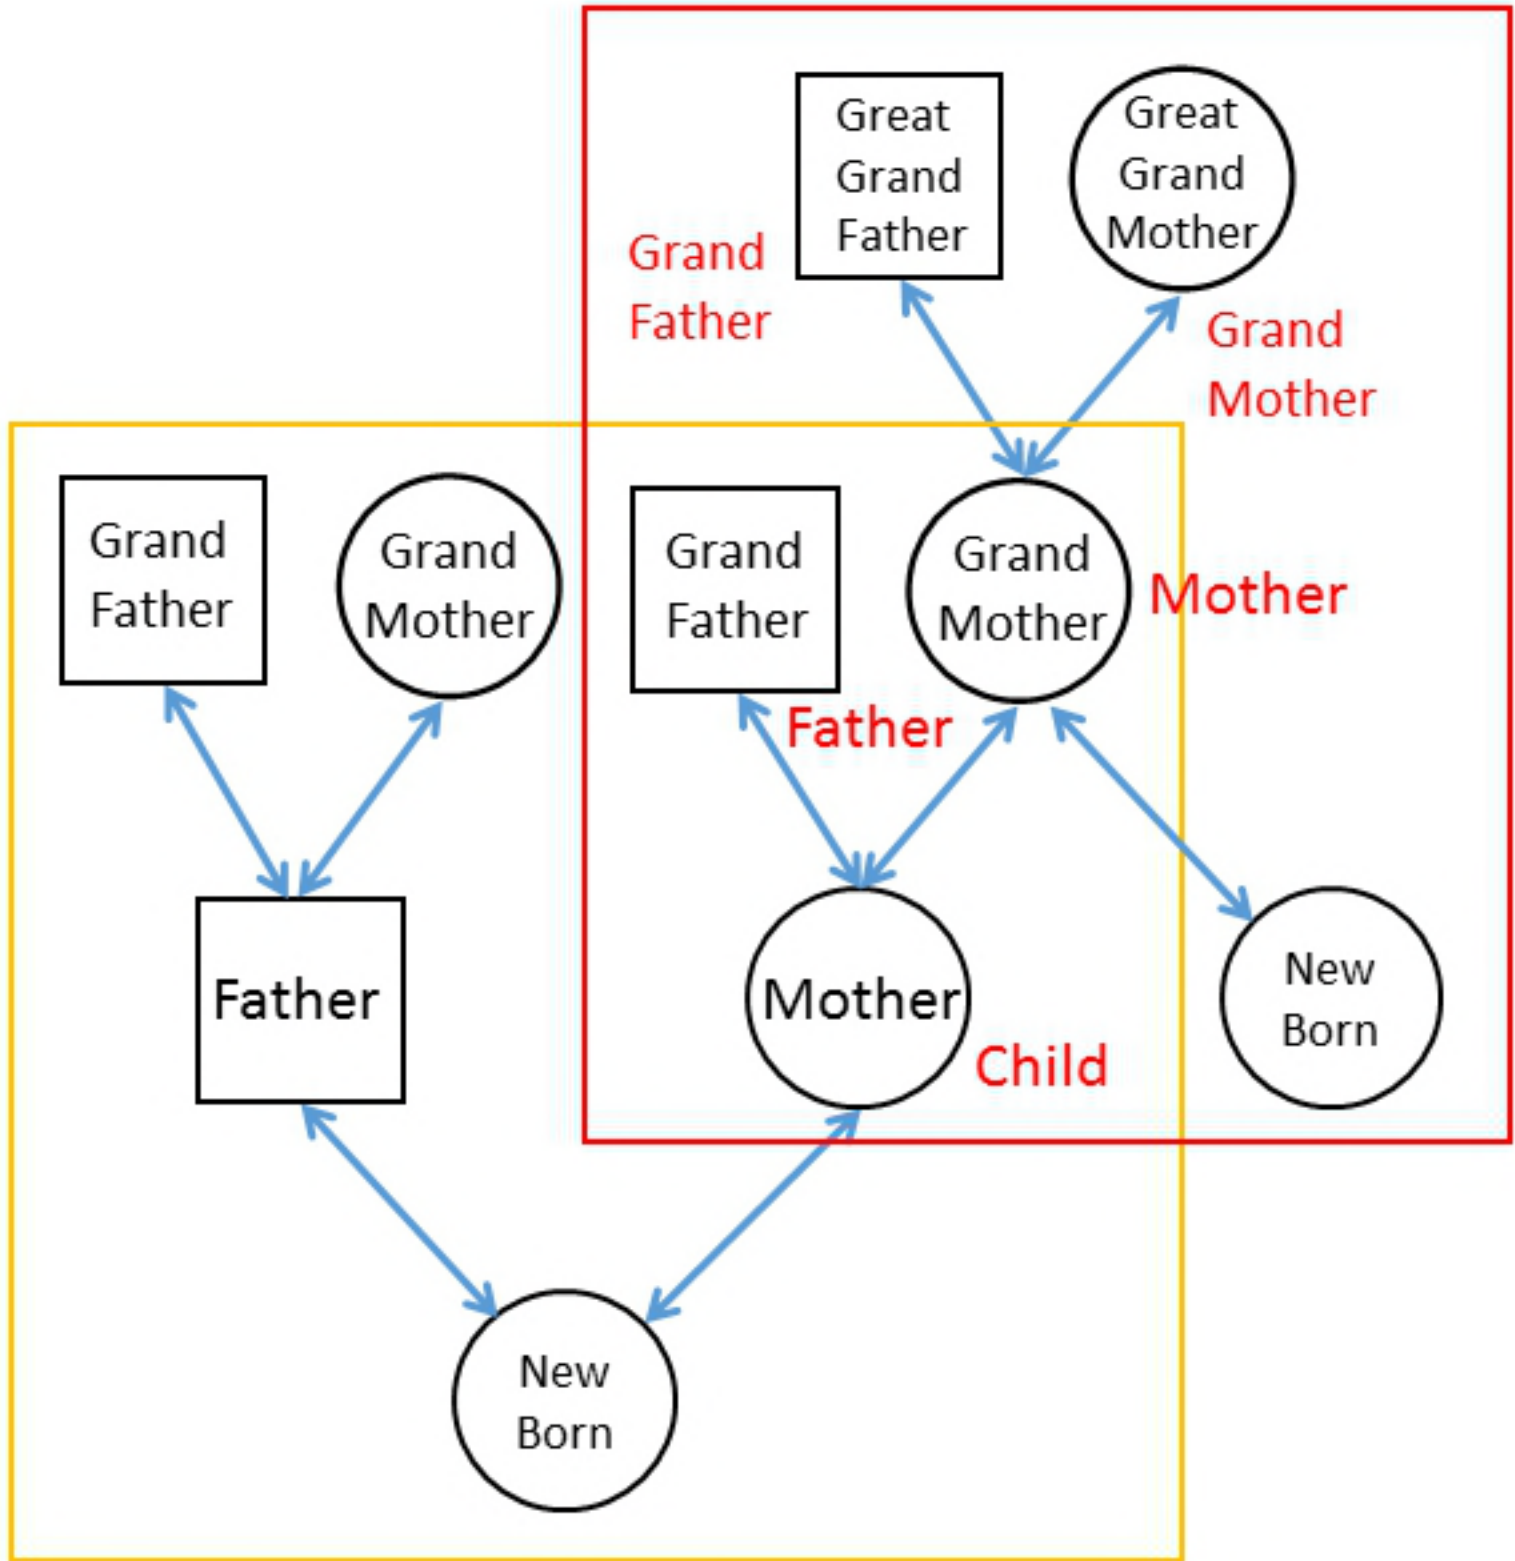

Figure3

Tohoku Mother 19xx/6/5 37Y Female

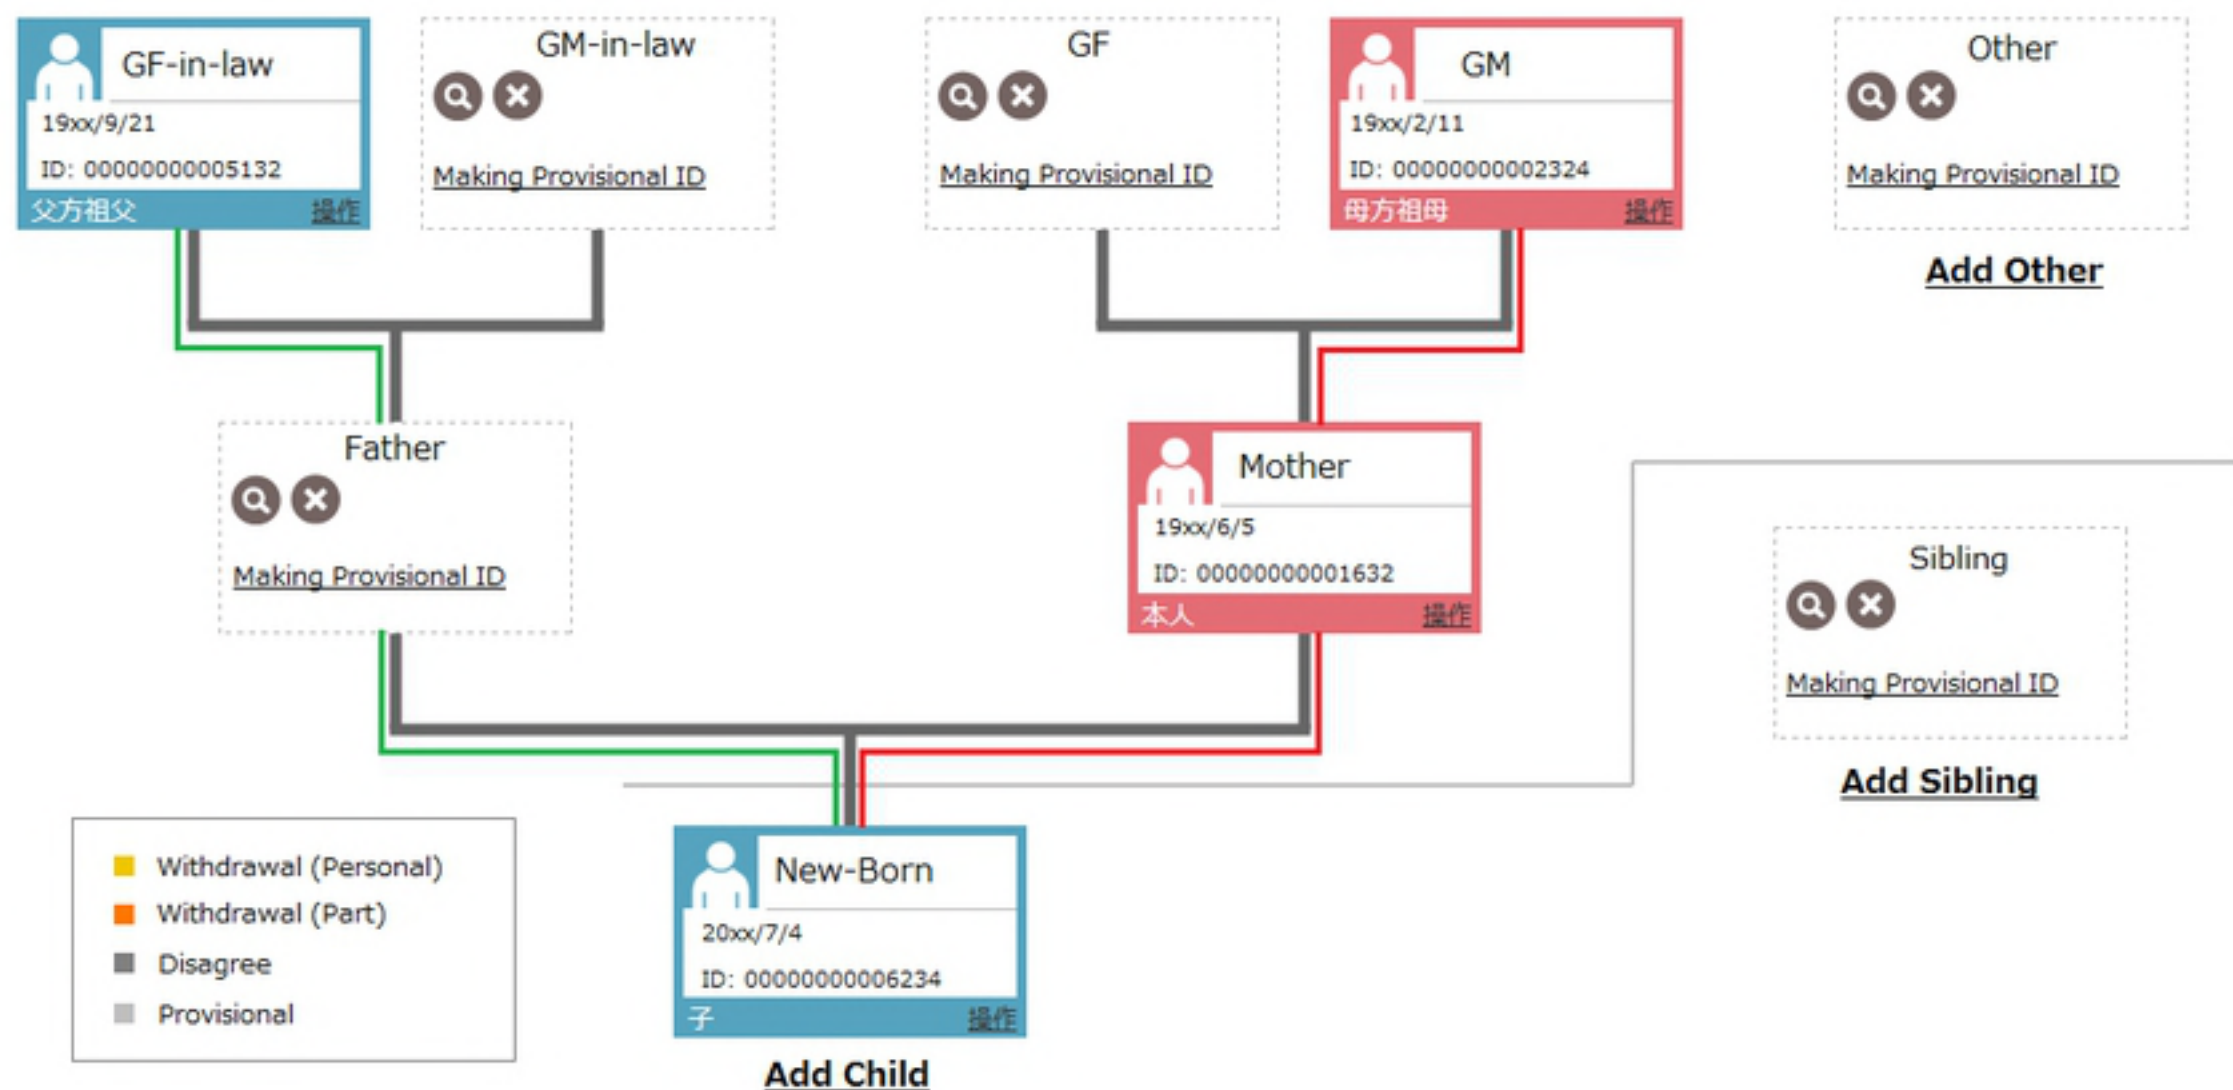

Figure4
